# Supplementary material for: Hyperoside and Quercitrin in Houttuynia cordata Extract Attenuate UVB-Induced Human Keratinocyte Cell Damage and Oxidative Stress via Modulation of MAPKs and Akt Signaling Pathway
Source: MDPI journal article supplement (doi:10.3390/antiox11020221), 2022-01-24
Supplement: s1 [file s1]

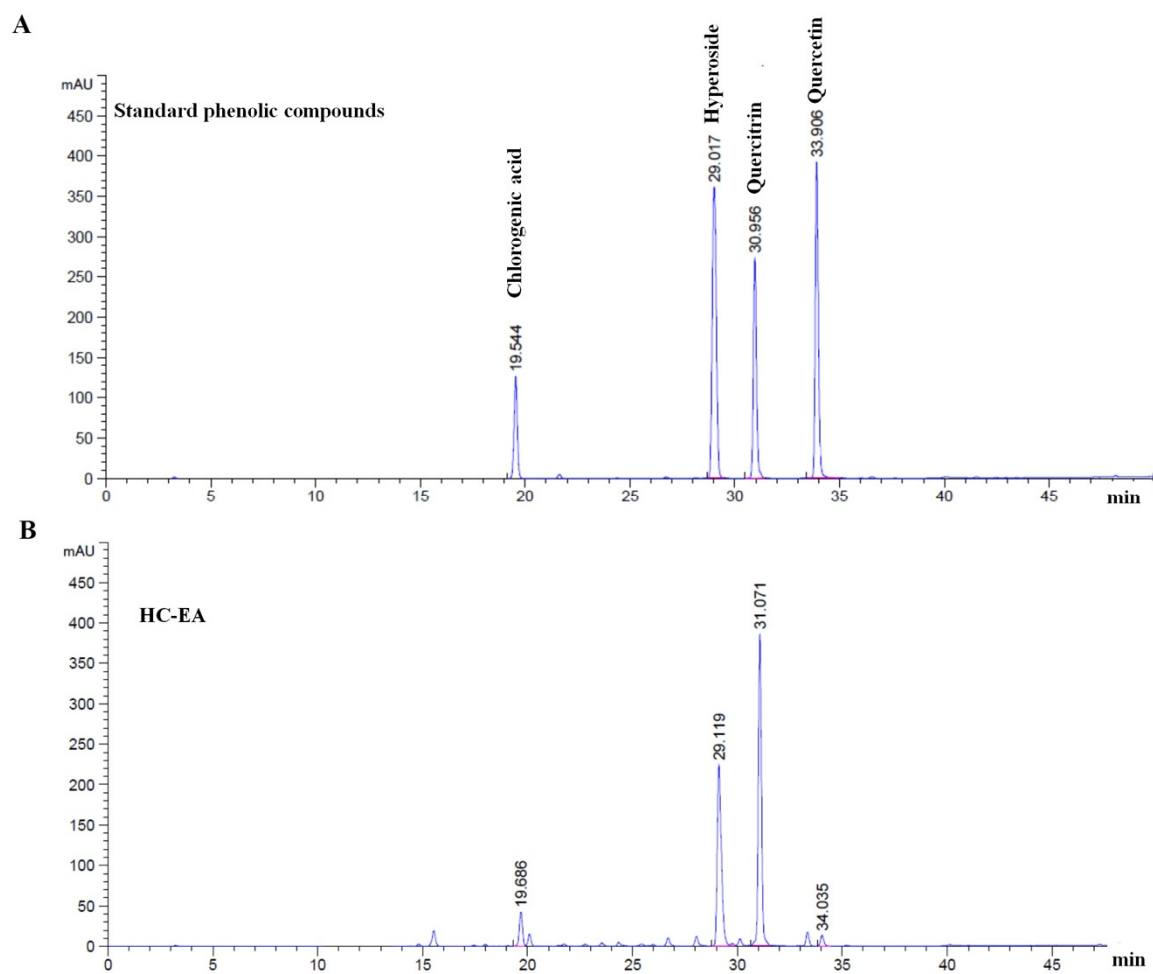

**Figure S1**

HPLC chromatogram of HC-EA and its standard compounds mixture. (A) HPLC chromatogram of the standard compounds of chlorogenic acid, hyperoside, quercitrin, and quercetin. (B) HPLC chromatogram of HC-EA.
